# Supplementary material for: Muscle Spasms – A Common Symptom Following Theraphosid Spider Bites?
Source: Preprints.org preprint supplement (doi:10.20944/preprints202012.0145.v2), 2021-01-05
Supplement: Supplementary file 3 [file supplementary]

## Sheet: Supplementary Table S1
Subfamily	Genus	Trade name	Carapace length (mm)	Dried venom yield (mg)
Aviculariinae	Avicularia	Avicularia bizegoi	20.5	6.2
Aviculariinae	Avicularia	Avicularia braunshauseni	18.5	0.1
Aviculariinae	Avicularia	Avicularia braunshauseni	20.1	0.1
Aviculariinae	Avicularia	Avicularia braunshauseni	22	0.3
Aviculariinae	Avicularia	Avicularia geroldi	20.5	0.7
Aviculariinae	Avicularia	Avicularia metallica	15	2.2
Aviculariinae	Avicularia	Avicularia minatrix	10	0.4
Aviculariinae	Avicularia	Avicularia minatrix	10.6	0.1
Aviculariinae	Avicularia	Avicularia minatrix	11	0.4
Aviculariinae	Avicularia	Avicularia minatrix	11.7	0.8
Aviculariinae	Avicularia	Avicularia minatrix	12.1	1.1
Aviculariinae	Avicularia	Avicularia minatrix	12.1	0.1
Aviculariinae	Avicularia	Avicularia purpurea	19.7	3.9
Aviculariinae	Avicularia	Avicularia spec. ('pupurea wrong')	15.5	2.95
Aviculariinae	Avicularia	Avicularia spec. ("huriana")	20.2	5.92
Aviculariinae	Avicularia	Avicularia spec. (Amazonas Purple)	14.7	0.2
Aviculariinae	Avicularia	Avicularia spec. (Amazonas Purple)	16	0
Aviculariinae	Avicularia	Avicularia spec. (Bolivia)	14.4	0.7
Aviculariinae	Avicularia	Avicularia spec. (Bolivia)	18.8	0.8
Aviculariinae	Avicularia	Avicularia spec. (purple)	22.3	11.94
Aviculariinae	Avicularia	Avicularia ulrichea	16.5	1.8
Aviculariinae	Avicularia	Avicularia urticans	13	0.2
Aviculariinae	Avicularia	Avicularia urticans	20.6	2
Aviculariinae	Avicularia	Avicularia velutina	15.1	1.8
Aviculariinae	Caribena	Avicularia versicolor	15	0.3
Aviculariinae	Caribena	Avicularia versicolor	16	1.3
Aviculariinae	Caribena	Avicularia versicolor	17	1.1
Aviculariinae	Caribena	Avicularia versicolor	18.2	1.23
Aviculariinae	Iridopelma	Iridopelma hirsutum	14.1	0.4
Aviculariinae	Iridopelma	Iridopelma hirsutum	15.1	4.47
Aviculariinae	Iridopelma	Iridopelma hirsutum	15.2	0.91
Aviculariinae	Ybyrapora	Avicularia diversipes	14	0.3
Aviculariinae	Ybyrapora	Avicularia diversipes	14.5	2.8
Aviculariinae	Ybyrapora	Avicularia diversipes	14.5	0.9
Aviculariinae	Ybyrapora	Avicularia sooretama	11.1	0
Aviculariinae	Ybyrapora	Avicularia sooretama	13.1	0.6
Eumenophorinae	Hysterocrates	Hysterocrates cf. gigas	23.8	7.75
Eumenophorinae	Hysterocrates	Hysterocrates cf. gigas	25.1	20.35
Eumenophorinae	Hysterocrates	Hysterocrates cf. gigas	26	3.84
Eumenophorinae	Hysterocrates	Hysterocrates ederi	22.1	3.06
Eumenophorinae	Hysterocrates	Hysterocrates ederi	23.1	1.6
Eumenophorinae	Hysterocrates	Hysterocrates ederi	26.5	6.4
Eumenophorinae	Hysterocrates	Hysterocrates ederi	25	0.7
Eumenophorinae	Hysterocrates	Hysterocrates gigas	27	5.19
Eumenophorinae	Hysterocrates	Hysterocrates gigas	29.8	10.9
Eumenophorinae	Hysterocrates	Hysterocrates hercules	24.9	3.4
Eumenophorinae	Hysterocrates	Hysterocrates spec. (crassipes)	16.8	0
Eumenophorinae	Hysterocrates	Hysterocrates spec. (ederi)	22.6	0
Eumenophorinae	Hysterocrates	Hysterocrates spec. (ederi)	22.8	0
Eumenophorinae	Hysterocrates	Hysterocrates spec. (ederi)	23.4	0
Eumenophorinae	Hysterocrates	Hysterocrates spec. (ederi)	24	0.41
Eumenophorinae	Hysterocrates	Hysterocrates spec. (hercules)	23.7	1.1
Eumenophorinae	Hysterocrates	Hysterocrates spec. (hercules)	23.7	0.88
Eumenophorinae	Hysterocrates	Hysterocrates spec. (Kamerun)	21.4	0
Eumenophorinae	Hysterocrates	Hysterocrates spec. (Kamerun)	23.1	3.4
Eumenophorinae	Hysterocrates	Hysterocrates spec. (Kamerun)	23.5	2.08
Eumenophorinae	Hysterocrates	Hysterocrates spec. (Kamerun)	26.1	1.9
Eumenophorinae	Hysterocrates	Hysterocrates spec. (Kamerun)	27	1.1
Eumenophorinae	Hysterocrates	Hysterocrates spec. (Kamerun)	27.4	0.3
Eumenophorinae	Hysterocrates	Hysterocrates spec. (Nigeria)	23.4	0.1
Eumenophorinae	Hysterocrates	Hysterocrates spec. (Nigeria)	23.7	2.03
Eumenophorinae	Hysterocrates	Hysterocrates spec. (Nigeria)	28.5	4.2
Eumenophorinae	Hysterocrates	Hysterocrates spec. (Nigeria)	29.3	1.5
Eumenophorinae	Hysterocrates	Hysterocrates spec. (Nigeria)	32	13.53
Eumenophorinae	Hysterocrates	Hysterocrates spec. (West Kamerun)	22.4	1.23
Eumenophorinae	Hysterocrates	Hysterocrates spec. (West Kamerun)	23.4	0.29
Eumenophorinae	Hysterocrates	Hysterocrates spec. (West Kamerun)	23.6	0
Eumenophorinae	Hysterocrates	Hysterocrates spec. (West Kamerun)	24.4	2
Eumenophorinae	Monocentropus	Monocentropus balfouri	13.1	0.4
Eumenophorinae	Monocentropus	Monocentropus balfouri	14.3	1.2
Eumenophorinae	Monocentropus	Monocentropus balfouri	14.7	2
Eumenophorinae	Monocentropus	Monocentropus balfouri	19.6	0.76
Eumenophorinae	Monocentropus	Monocentropus lambertoni	19.5	2.35
Eumenophorinae	Monocentropus	Monocentropus lambertoni	20	2.88
Eumenophorinae	Monocentropus	Monocentropus lambertoni	20.4	5.88
Eumenophorinae	Monocentropus	Monocentropus lambertoni	20.5	2.63
Eumenophorinae	Monocentropus	Monocentropus lambertoni	20.7	0.57
Eumenophorinae	Monocentropus	Monocentropus lambertoni	20.7	0.3
Eumenophorinae	Monocentropus	Monocentropus lambertoni	21.8	0.6
Eumenophorinae	Monocentropus	Monocentropus lambertoni	24	1.5
Eumenophorinae	Monocentropus	Monocentropus lambertoni	26.2	0.5
Eumenophorinae	Pelinobius	Pelinobius muticus	17.9	0.55
Eumenophorinae	Pelinobius	Pelinobius muticus	18.1	0.4
Eumenophorinae	Pelinobius	Pelinobius muticus	26.7	0.5
Eumenophorinae	Pelinobius	Pelinobius muticus	27.1	0.1
Eumenophorinae	Pelinobius	Pelinobius muticus	27.3	0.1
Harpactirinae	Augacephalus	Augacephalus ezendami	17.5	5.6
Harpactirinae	Augacephalus	Augacephalus ezendami	18.1	0
Harpactirinae	Ceratogyrus	Ceratogyrus bechunanicus	19.3	5.8
Harpactirinae	Ceratogyrus	Ceratogyrus darlingi	19.4	3.66
Harpactirinae	Ceratogyrus	Ceratogyrus darlingi	22.1	0
Harpactirinae	Ceratogyrus	Ceratogyrus darlingi	22.2	3.25
Harpactirinae	Ceratogyrus	Ceratogyrus marshalli	15.4	0.3
Harpactirinae	Ceratogyrus	Ceratogyrus marshalli	16.7	2.9
Harpactirinae	Ceratogyrus	Ceratogyrus marshalli	18.3	3
Harpactirinae	Ceratogyrus	Ceratogyrus marshalli	20.1	5.3
Harpactirinae	Ceratogyrus	Ceratogyrus meridionalis	15.5	0.1
Harpactirinae	Eucratoscelus	Eucratoscelus constrictus	12.5	0
Harpactirinae	Eucratoscelus	Eucratoscelus constrictus	15.9	0.1
Harpactirinae	Eucratoscelus	Eucratoscelus constrictus	17	1.42
Harpactirinae	Eucratoscelus	Eucratoscelus pachypus	12.3	1.21
Harpactirinae	Eucratoscelus	Eucratoscelus pachypus	13.1	0.6
Harpactirinae	Eucratoscelus	Eucratoscelus pachypus	14.6	0.6
Harpactirinae	Eucratoscelus	Eucratoscelus pachypus	16.6	0.48
Harpactirinae	Harpactira	Harpactira guttata	16.1	0.49
Harpactirinae	Harpactira	Harpactira guttata	18.1	2.96
Harpactirinae	Harpactirella	Harpactirella lightfooti	7.4	0.31
Harpactirinae	Harpactirella	Harpactirella lightfooti	8.4	0
Harpactirinae	Harpactirella	Harpactirella lightfooti	10.2	0.6
Harpactirinae	Idiothele	Idiothele mira	11.5	0.1
Harpactirinae	Idiothele	Idiothele mira	13.3	0.2
Harpactirinae	Idiothele	Idiothele nigrofulva	10.2	0.1
Harpactirinae	Pterinochilus	Pterinochilus chordatus	14.3	0.4
Harpactirinae	Pterinochilus	Pterinochilus chordatus	14.4	3.8
Harpactirinae	Pterinochilus	Pterinochilus chordatus	19.7	0.14
Harpactirinae	Pterinochilus	Pterinochilus chordatus	21.1	0.3
Harpactirinae	Pterinochilus	Pterinochilus chordatus	21.2	3.78
Harpactirinae	Pterinochilus	Pterinochilus chordatus	21.6	3.5
Harpactirinae	Pterinochilus	Pterinochilus lugardi	11.2	0.37
Harpactirinae	Pterinochilus	Pterinochilus lugardi	12.5	0.1
Harpactirinae	Pterinochilus	Pterinochilus lugardi	12.8	0.1
Harpactirinae	Pterinochilus	Pterinochilus lugardi	13.3	0.5
Harpactirinae	Pterinochilus	Pterinochilus lugardi	14.4	0.32
Harpactirinae	Pterinochilus	Pterinochilus lugardi	16.3	4.54
Harpactirinae	Pterinochilus	Pterinochilus murinus	16.1	6
Harpactirinae	Pterinochilus	Pterinochilus murinus	16.1	3.2
Harpactirinae	Pterinochilus	Pterinochilus murinus	16.8	6.1
Harpactirinae	Pterinochilus	Pterinochilus murinus	18.7	2.7
Harpactirinae	Pterinochilus	Pterinochilus murinus	19.2	5.51
Harpactirinae	Pterinochilus	Pterinochilus murinus	19.6	5.1
Harpactirinae	Pterinochilus	Pterinochilus murinus	21.2	1.78
Harpactirinae	Pterinochilus	Pterinochilus murinus	21.4	0.3
Harpactirinae	Pterinochilus	Pterinochilus murinus (Kenia)	13.8	0.2
Harpactirinae	Pterinochilus	Pterinochilus murinus (Kenia)	19.5	2.1
Harpactirinae	Pterinochilus	Pterinochilus murinus (red color form)	15.9	0
Harpactirinae	Pterinochilus	Pterinochilus murinus (red color form)	19.9	0
Ischnocolinae	Catumiri	Catumiri argentinense	5.8	0.1
Ischnocolinae	Chaetopelma	Chaetopelma olivaceum	9.9	0.4
Ischnocolinae	Chaetopelma	Chaetopelma spec. (Israel)	11.4	0.6
Ischnocolinae	Chaetopelma	Chaetopelma spec. (Libanon)	11.2	2.16
Ischnocolinae	Heterothele	Heterothele vilosella	7.4	0.1
Ischnocolinae	Heterothele	Heterothele vilosella	7.6	0.1
Ischnocolinae	Heterothele	Heterothele vilosella	7.6	0
Ischnocolinae	Heterothele	Heterothele vilosella	8.2	0
Ischnocolinae	Heterothele	Heterothele vilosella	8.4	0
Ischnocolinae	Heterothele	Heterothele vilosella	8.8	0.2
Ischnocolinae	Holothele	Holothele randoni	14.5	1.81
Ischnocolinae	Holothele	Holothele spec. (Colombia)	12.4	0.8
Ischnocolinae	Holothele	Holothele spec. (Colombia)	13.1	0.2
Ischnocolinae	Holothele	Holothele spec. (Colombia)	14.1	0.1
Ischnocolinae	Holothele	Holothele spec. (Colombia)	15.7	0.3
Ischnocolinae	Holothele	Holothele spec. (Colombia)	15.9	2.4
Ischnocolinae	Holothele	Holothele spec. (Colombia)	18.1	0.1
Ischnocolinae	Ischnocolus	Ischnocolus valentinus	5.6	0.1
Ischnocolinae	Ischnocolus	Ischnocolus valentinus	6.6	0
Ischnocolinae	Ischnocolus	Ischnocolus valentinus	6.7	0
Ischnocolinae	Ischnocolus	Ischnocolus valentinus	6.9	0
Ischnocolinae	Ischnocolus	Ischnocolus valentinus	7	0.6
Ischnocolinae	Plesiophrictus	Plesiophrictus spec. (India)	6	0
Ischnocolinae	Plesiophrictus	Plesiophrictus spec. (India)	6.4	0.1
Ischnocolinae	Plesiophrictus	Plesiophrictus spec. (India)	6.4	0
Ischnocolinae	Plesiophrictus	Plesiophrictus spec. (India)	6.5	0
Ornithoctoninae	Haplopelma	Haplopelma albostriatum	16.9	1.4
Ornithoctoninae	Haplopelma	Haplopelma albostriatum	18.2	0.3
Ornithoctoninae	Haplopelma	Haplopelma albostriatum	18.6	1.4
Ornithoctoninae	Haplopelma	Haplopelma albostriatum	20.3	6.39
Ornithoctoninae	Haplopelma	Haplopelma cf. longipes	16.2	4.21
Ornithoctoninae	Haplopelma	Haplopelma cf. longipes	17.3	0.2
Ornithoctoninae	Haplopelma	Haplopelma doriae	17.1	1.7
Ornithoctoninae	Haplopelma	Haplopelma hainanum	20	3.7
Ornithoctoninae	Haplopelma	Haplopelma hainanum	22.9	14.04
Ornithoctoninae	Haplopelma	Haplopelma hainanum	23	1.07
Ornithoctoninae	Haplopelma	Haplopelma hainanum	24.9	6.8
Ornithoctoninae	Haplopelma	Haplopelma hainanum	26.5	15.1
Ornithoctoninae	Haplopelma	Haplopelma hainanum	26.7	5.3
Ornithoctoninae	Haplopelma	Haplopelma hainanum	28.9	14.7
Ornithoctoninae	Haplopelma	Haplopelma hainanum	29.2	3.8
Ornithoctoninae	Haplopelma	Haplopelma lividum	14.7	3.14
Ornithoctoninae	Haplopelma	Haplopelma lividum	15.3	0.55
Ornithoctoninae	Haplopelma	Haplopelma lividum	16.3	0
Ornithoctoninae	Haplopelma	Haplopelma lividum	17.4	0.2
Ornithoctoninae	Haplopelma	Haplopelma lividum	19	1.89
Ornithoctoninae	Haplopelma	Haplopelma lividum	19.7	5
Ornithoctoninae	Haplopelma	Haplopelma lividum	20.6	12
Ornithoctoninae	Haplopelma	Haplopelma lividum	20.8	0.87
Ornithoctoninae	Haplopelma	Haplopelma minax	21.4	1.4
Ornithoctoninae	Haplopelma	Haplopelma minax ("big black")	23.5	7.42
Ornithoctoninae	Haplopelma	Haplopelma minax ("big black")	24.9	6.66
Ornithoctoninae	Haplopelma	Haplopelma schmidti	15.7	0
Ornithoctoninae	Haplopelma	Haplopelma schmidti	17.9	0
Ornithoctoninae	Haplopelma	Haplopelma schmidti	19	0
Ornithoctoninae	Haplopelma	Haplopelma schmidti	19.6	0
Ornithoctoninae	Haplopelma	Haplopelma schmidti	21.9	5.1
Ornithoctoninae	Haplopelma	Haplopelma spec. (Thailand)	23	4.39
Ornithoctoninae	Haplopelma	Haplopelma spec. (Vietnam)	17.4	3.78
Ornithoctoninae	Haplopelma	Haplopelma spec. (Vietnam)	18.1	7.06
Ornithoctoninae	Lampropelma	Cyriopagopus spec. ('Sulawesi black')	20.5	1.93
Ornithoctoninae	Lampropelma	Cyriopagopus spec. ('Sulawesi black')	21.3	2.2
Ornithoctoninae	Lampropelma	Cyriopagopus spec. (Sulawesi)	19.6	0.3
Ornithoctoninae	Lampropelma	Lampropelma nigerrimum	14.8	4.1
Ornithoctoninae	Lampropelma	Lampropelma nigerrimum	18	2.1
Ornithoctoninae	Omothymus	Cyriopagopus spec. (Sumatra tiger)	28	8.05
Ornithoctoninae	Omothymus	Lampropelma violaceopes	20.1	0.7
Ornithoctoninae	Omothymus	Lampropelma violaceopes	21.1	0
Ornithoctoninae	Omothymus	Omothymus schioedtei	21.8	1.8
Ornithoctoninae	Omothymus	Omothymus schioedtei	23.2	4.9
Ornithoctoninae	Ornithoctonus	Ornithoctonus aureotibialis	14.6	0.1
Ornithoctoninae	Ornithoctonus	Ornithoctonus aureotibialis	15	1.9
Ornithoctoninae	Ornithoctonus	Ornithoctonus aureotibialis	15	0.6
Ornithoctoninae	Ornithoctonus	Ornithoctonus aureotibialis	16.1	0.4
Ornithoctoninae	Ornithoctonus	Ornithoctonus aureotibialis	17	4.2
Ornithoctoninae	Ornithoctonus	Ornithoctonus aureotibialis	17	1.68
Ornithoctoninae	Ornithoctonus	Ornithoctonus aureotibialis	21.1	0.3
Ornithoctoninae	Ornithoctonus	Ornithoctonus spec. (Thailand)	11.6	0.2
Ornithoctoninae	Phormingochilus	Lampropelma spec. ('Borneo black')	8.8	0
Ornithoctoninae	Phormingochilus	Lampropelma spec. ('Borneo black')	16.5	0.14
Ornithoctoninae	Phormingochilus	Lampropelma spec. ('Borneo black')	20	0.5
Ornithoctoninae	Phormingochilus	Lampropelma spec. (Borneo black)	15.8	0.1
Ornithoctoninae	Phormingochilus	Phormingochilus everetti	17.2	4.2
Ornithoctoninae	Phormingochilus	Phormingochilus everetti	19.9	5.2
Poecilotheriinae	Poecilotheria	Poecilotheria fasciata	18.7	1.73
Poecilotheriinae	Poecilotheria	Poecilotheria fasciata	22.3	13.67
Poecilotheriinae	Poecilotheria	Poecilotheria fasciata	22.9	19.2
Poecilotheriinae	Poecilotheria	Poecilotheria fasciata	23	0.93
Poecilotheriinae	Poecilotheria	Poecilotheria fasciata	23.6	17.6
Poecilotheriinae	Poecilotheria	Poecilotheria fasciata	22.9	0
Poecilotheriinae	Poecilotheria	Poecilotheria fasciata	25.1	12.84
Poecilotheriinae	Poecilotheria	Poecilotheria formosa	25.1	0.1
Poecilotheriinae	Poecilotheria	Poecilotheria formosa	24.3	11.46
Poecilotheriinae	Poecilotheria	Poecilotheria formosa	25	6.4
Poecilotheriinae	Poecilotheria	Poecilotheria formosa	25.7	0.19
Poecilotheriinae	Poecilotheria	Poecilotheria hanumavilasumica	18.4	2
Poecilotheriinae	Poecilotheria	Poecilotheria metallica	18	2.2
Poecilotheriinae	Poecilotheria	Poecilotheria metallica	19.1	3.33
Poecilotheriinae	Poecilotheria	Poecilotheria metallica	22.2	10.26
Poecilotheriinae	Poecilotheria	Poecilotheria metallica	23	27.22
Poecilotheriinae	Poecilotheria	Poecilotheria metallica	23	1.93
Poecilotheriinae	Poecilotheria	Poecilotheria metallica	23.9	5.61
Poecilotheriinae	Poecilotheria	Poecilotheria metallica	27.5	5.21
Poecilotheriinae	Poecilotheria	Poecilotheria metallica	23	0.91
Poecilotheriinae	Poecilotheria	Poecilotheria metallica	25	4.22
Poecilotheriinae	Poecilotheria	Poecilotheria metallica	26.1	2.47
Poecilotheriinae	Poecilotheria	Poecilotheria miranda	14.4	1.19
Poecilotheriinae	Poecilotheria	Poecilotheria miranda	21	9.28
Poecilotheriinae	Poecilotheria	Poecilotheria miranda	23.2	1.6
Poecilotheriinae	Poecilotheria	Poecilotheria miranda	25.68	9.53
Poecilotheriinae	Poecilotheria	Poecilotheria miranda	26.2	13.05
Poecilotheriinae	Poecilotheria	Poecilotheria ornata	23.4	5.4
Poecilotheriinae	Poecilotheria	Poecilotheria ornata	23.4	0
Poecilotheriinae	Poecilotheria	Poecilotheria ornata	25.3	11.25
Poecilotheriinae	Poecilotheria	Poecilotheria regalis	21.3	9.87
Poecilotheriinae	Poecilotheria	Poecilotheria regalis	23	7.36
Poecilotheriinae	Poecilotheria	Poecilotheria regalis	24.9	21.96
Poecilotheriinae	Poecilotheria	Poecilotheria regalis	23	0
Poecilotheriinae	Poecilotheria	Poecilotheria regalis	24	9.41
Poecilotheriinae	Poecilotheria	Poecilotheria regalis	26.4	4.2
Poecilotheriinae	Poecilotheria	Poecilotheria rufilata	25	22.14
Poecilotheriinae	Poecilotheria	Poecilotheria rufilata	25.3	3.7
Poecilotheriinae	Poecilotheria	Poecilotheria rufilata	25.6	7.1
Poecilotheriinae	Poecilotheria	Poecilotheria rufilata	25.1	11.39
Poecilotheriinae	Poecilotheria	Poecilotheria smithi	17.8	1.15
Poecilotheriinae	Poecilotheria	Poecilotheria smithi	20.1	1.1
Poecilotheriinae	Poecilotheria	Poecilotheria smithi	24.4	3.56
Poecilotheriinae	Poecilotheria	Poecilotheria striata	19.3	0.3
Poecilotheriinae	Poecilotheria	Poecilotheria striata	19.6	0.3
Poecilotheriinae	Poecilotheria	Poecilotheria subfusca	23.2	13.71
Poecilotheriinae	Poecilotheria	Poecilotheria subfusca ('highland')	17	0.09
Poecilotheriinae	Poecilotheria	Poecilotheria subfusca ('highland')	19.7	0
Poecilotheriinae	Poecilotheria	Poecilotheria subfusca ('highland')	20.2	2.23
Poecilotheriinae	Poecilotheria	Poecilotheria subfusca ('highland')	20.6	0.57
Poecilotheriinae	Poecilotheria	Poecilotheria subfusca ('highland')	20.7	0.5
Poecilotheriinae	Poecilotheria	Poecilotheria subfusca ('highland')	20.8	0.7
Poecilotheriinae	Poecilotheria	Poecilotheria subfusca ('lowland')	24.8	0
Poecilotheriinae	Poecilotheria	Poecilotheria tigrinawesseli	25.5	9.06
Poecilotheriinae	Poecilotheria	Poecilotheria tigrinawesseli	25.5	1.99
Poecilotheriinae	Poecilotheria	Poecilotheria tigrinawesseli	25.6	3.76
Poecilotheriinae	Poecilotheria	Poecilotheria tigrinawesseli	27.6	5.17
Poecilotheriinae	Poecilotheria	Poecilotheria vittata	19.5	8
Poecilotheriinae	Poecilotheria	Poecilotheria vittata	20	0.1
Poecilotheriinae	Poecilotheria	Poecilotheria vittata	27	14.18
Psalmopoeinae	Ephebopus	Ephebopus cyanognathus	12.1	0.4
Psalmopoeinae	Ephebopus	Ephebopus cyanognathus	12.2	0
Psalmopoeinae	Ephebopus	Ephebopus murinus	16.6	0.56
Psalmopoeinae	Ephebopus	Ephebopus murinus	18.2	4
Psalmopoeinae	Ephebopus	Ephebopus rufescens	14.8	0.3
Psalmopoeinae	Ephebopus	Ephebopus rufescens	15	0.23
Psalmopoeinae	Ephebopus	Ephebopus rufescens	15.7	6.4
Psalmopoeinae	Ephebopus	Ephebopus rufescens	16.1	0.38
Psalmopoeinae	Ephebopus	Ephebopus rufescens	15.4	2.2
Psalmopoeinae	Ephebopus	Ephebopus uatuman	13.9	0.6
Psalmopoeinae	Ephebopus	Ephebopus uatuman	17.1	0.9
Psalmopoeinae	Psalmopoeus	Psalmopoeus cambridgei	17	0.4
Psalmopoeinae	Psalmopoeus	Psalmopoeus cambridgei	18	0
Psalmopoeinae	Psalmopoeus	Psalmopoeus cambridgei	19.1	0
Psalmopoeinae	Psalmopoeus	Psalmopoeus cambridgei	19.5	0
Psalmopoeinae	Psalmopoeus	Psalmopoeus cambridgei	20.3	0.7
Psalmopoeinae	Psalmopoeus	Psalmopoeus cambridgei	20.9	0
Psalmopoeinae	Psalmopoeus	Psalmopoeus cambridgei	21	2.81
Psalmopoeinae	Psalmopoeus	Psalmopoeus cambridgei	21.3	0
Psalmopoeinae	Psalmopoeus	Psalmopoeus irminia	14.1	1.3
Psalmopoeinae	Psalmopoeus	Psalmopoeus irminia	15.3	1.1
Psalmopoeinae	Psalmopoeus	Psalmopoeus irminia	15.7	0.6
Psalmopoeinae	Psalmopoeus	Psalmopoeus irminia	16.4	0
Psalmopoeinae	Psalmopoeus	Psalmopoeus irminia	17.4	0.2
Psalmopoeinae	Psalmopoeus	Psalmopoeus irminia	17.8	1.9
Psalmopoeinae	Psalmopoeus	Psalmopoeus irminia	18	0.1
Psalmopoeinae	Psalmopoeus	Psalmopoeus irminia	18.2	0.1
Psalmopoeinae	Psalmopoeus	Psalmopoeus irminia	18.9	6.3
Psalmopoeinae	Psalmopoeus	Psalmopoeus langenbucheri	11.8	0.1
Psalmopoeinae	Psalmopoeus	Psalmopoeus langenbucheri	12.8	0.6
Psalmopoeinae	Psalmopoeus	Psalmopoeus langenbucheri	13.1	1
Psalmopoeinae	Psalmopoeus	Psalmopoeus langenbucheri	13.2	4.7
Psalmopoeinae	Psalmopoeus	Psalmopoeus langenbucheri	13.3	1.2
Psalmopoeinae	Psalmopoeus	Psalmopoeus langenbucheri	14.8	0.25
Psalmopoeinae	Psalmopoeus	Psalmopoeus pulcher	15.5	0
Psalmopoeinae	Psalmopoeus	Psalmopoeus pulcher	15.7	0
Psalmopoeinae	Psalmopoeus	Psalmopoeus pulcher	17.1	4.7
Psalmopoeinae	Psalmopoeus	Psalmopoeus pulcher	17.3	2.66
Psalmopoeinae	Psalmopoeus	Psalmopoeus pulcher	19.6	11.43
Psalmopoeinae	Psalmopoeus	Psalmopoeus reduncus	12.1	0
Psalmopoeinae	Psalmopoeus	Psalmopoeus reduncus	12.5	1.1
Psalmopoeinae	Psalmopoeus	Psalmopoeus reduncus	12.5	0.3
Psalmopoeinae	Psalmopoeus	Psalmopoeus reduncus	13.4	0.6
Psalmopoeinae	Psalmopoeus	Psalmopoeus reduncus	13.6	0.7
Psalmopoeinae	Psalmopoeus	Psalmopoeus reduncus	14.5	0.4
Psalmopoeinae	Psalmopoeus	Psalmopoeus reduncus	14.5	0.1
Psalmopoeinae	Psalmopoeus	Psalmopoeus reduncus	14.7	0.3
Psalmopoeinae	Psalmopoeus	Psalmopoeus reduncus	16.4	7.3
Psalmopoeinae	Psalmopoeus	Psalmopoeus reduncus	16.4	2.93
Psalmopoeinae	Pseudoclamoris	Tapinauchenius elenae	16.9	7.7
Psalmopoeinae	Pseudoclamoris	Tapinauchenius elenae	17.5	5.4
Psalmopoeinae	Pseudoclamoris	Tapinauchenius gigas	13.2	0.8
Psalmopoeinae	Pseudoclamoris	Tapinauchenius gigas	18.6	12.2
Psalmopoeinae	Pseudoclamoris	Tapinauchenius subcaeruleus	14.5	0.3
Psalmopoeinae	Tapinauchenius	Tapinauchenius cupreus	15.5	3.5
Psalmopoeinae	Tapinauchenius	Tapinauchenius cupreus	15.6	0.4
Psalmopoeinae	Tapinauchenius	Tapinauchenius cupreus	17.4	6.8
Psalmopoeinae	Tapinauchenius	Tapinauchenius latipes	16.3	0.2
Psalmopoeinae	Tapinauchenius	Tapinauchenius latipes	17.4	2.23
Psalmopoeinae	Tapinauchenius	Tapinauchenius latipes	18.1	0
Psalmopoeinae	Tapinauchenius	Tapinauchenius plumipes	10.7	0.3
Psalmopoeinae	Tapinauchenius	Tapinauchenius plumipes	11.1	0.5
Psalmopoeinae	Tapinauchenius	Tapinauchenius plumipes	12.3	0.8
Psalmopoeinae	Tapinauchenius	Tapinauchenius plumipes	12.5	0.5
Psalmopoeinae	Tapinauchenius	Tapinauchenius plumipes	14.9	0.28
Psalmopoeinae	Tapinauchenius	Tapinauchenius plumipes	15	0.22
Psalmopoeinae	Tapinauchenius	Tapinauchenius plumipes	15.4	2.54
Psalmopoeinae	Tapinauchenius	Tapinauchenius sanctivincenti	16.2	0.11
Psalmopoeinae	Tapinauchenius	Tapinauchenius sanctivincenti	17	2.71
Psalmopoeinae	Tapinauchenius	Tapinauchenius sanctivincenti	18.1	5.1
Psalmopoeinae	Tapinauchenius	Tapinauchenius sanctivincenti	18.1	0.47
Psalmopoeinae	Tapinauchenius	Tapinauchenius sanctivincenti	19.3	3.77
Psalmopoeinae	Tapinauchenius	Tapinauchenius sanctivincenti	19.6	4.62
Psalmopoeinae	Tapinauchenius	Tapinauchenius violaceus	11.8	0.24
Psalmopoeinae	Tapinauchenius	Tapinauchenius violaceus	12.4	0.7
Psalmopoeinae	Tapinauchenius	Tapinauchenius violaceus	14.5	0.1
Schismatothelinae	Neoholothele	Neoholothele fasciaaurinigra	10	0.1
Schismatothelinae	Neoholothele	Neoholothele fasciaaurinigra	10.2	0.1
Schismatothelinae	Neoholothele	Neoholothele fasciaaurinigra	10.7	0.2
Schismatothelinae	Neoholothele	Neoholothele fasciaaurinigra	10.7	0
Schismatothelinae	Neoholothele	Neoholothele fasciaaurinigra	11	0.9
Schismatothelinae	Neoholothele	Neoholothele fasciaaurinigra	11.2	0.2
Schismatothelinae	Neoholothele	Neoholothele fasciaaurinigra	11.3	1.1
Schismatothelinae	Neoholothele	Neoholothele fasciaaurinigra	11.5	0.6
Schismatothelinae	Neoholothele	Neoholothele fasciaaurinigra	11.8	0.82
Schismatothelinae	Neoholothele	Neoholothele fasciaaurinigra	11.8	0
Schismatothelinae	Neoholothele	Neoholothele fasciaaurinigra	13.4	0.4
Schismatothelinae	Neoholothele	Neoholothele incei	8.1	0.3
Schismatothelinae	Neoholothele	Neoholothele incei	9.1	0.2
Schismatothelinae	Neoholothele	Neoholothele incei	11.6	0.1
Schismatothelinae	Neoholothele	Neoholothele incei	12	0.1
Schismatothelinae	Schismatothele	Hemiercus spec. (Colombia)	11.4	0.1
Schismatothelinae	Schismatothele	Hemiercus spec. (Colombia)	11.6	2.6
Schismatothelinae	Schismatothele	Hemiercus spec. (Venezuela)	13.8	1.3
Schismatothelinae	Schismatothele	Schismatothele inflata	11.5	0
Schismatothelinae	Schismatothele	Schismatothele inflata	13.1	0.4
Selenocosmiinae	Chilobrachys	Chilobrachys dyscolus	18.8	0.3
Selenocosmiinae	Chilobrachys	Chilobrachys dyscolus	20.2	1.77
Selenocosmiinae	Chilobrachys	Chilobrachys dyscolus	21	2.18
Selenocosmiinae	Chilobrachys	Chilobrachys dyscolus	21.1	7.9
Selenocosmiinae	Chilobrachys	Chilobrachys dyscolus	21.7	0.6
Selenocosmiinae	Chilobrachys	Chilobrachys dyscolus	23	8.63
Selenocosmiinae	Chilobrachys	Chilobrachys dyscolus	24.1	6.1
Selenocosmiinae	Chilobrachys	Chilobrachys fimbriatus	16.5	0.2
Selenocosmiinae	Chilobrachys	Chilobrachys fimbriatus	22.3	7.4
Selenocosmiinae	Chilobrachys	Chilobrachys guangxiensis	20.3	5.9
Selenocosmiinae	Chilobrachys	Chilobrachys guangxiensis	22.4	0
Selenocosmiinae	Chilobrachys	Chilobrachys guangxiensis	27.5	6
Selenocosmiinae	Chilobrachys	Chilobrachys huahini	20	7.1
Selenocosmiinae	Chilobrachys	Chilobrachys spec. (India)	11.3	1.3
Selenocosmiinae	Chilobrachys	Chilobrachys spec. (Malaysia)	13.1	1.9
Selenocosmiinae	Chilobrachys	Chilobrachys spec. (Malaysia)	13.2	0.1
Selenocosmiinae	Chilobrachys	Chilobrachys spec. (Malaysia)	13.7	0.2
Selenocosmiinae	Chilobrachys	Chilobrachys spec. (Malaysia)	20.4	0.5
Selenocosmiinae	Lyrognathus	Lyrognathus giannisposatoi	17	0.15
Selenocosmiinae	Lyrognathus	Lyrognathus giannisposatoi	17.2	0.51
Selenocosmiinae	Lyrognathus	Lyrognathus giannisposatoi	17.4	0.5
Selenocosmiinae	Lyrognathus	Lyrognathus giannisposatoi	18.1	0.4
Selenocosmiinae	Lyrognathus	Lyrognathus giannisposatoi	18.3	0.36
Selenocosmiinae	Lyrognathus	Lyrognathus lessunda	19	0.26
Selenocosmiinae	Orphnaecus	Orphnaecus pellitus	17.6	0.4
Selenocosmiinae	Orphnaecus	Orphnaecus philippinus	16.5	4.3
Selenocosmiinae	Orphnaecus	Orphnaecus spec.	15.1	0.5
Selenocosmiinae	Orphnaecus	Orphnaecus spec. (Philippines)	10	0.28
Selenocosmiinae	Orphnaecus	Orphnaecus spec. (Philippines)	12.2	0
Selenocosmiinae	Orphnaecus	Orphnaecus spec. (Philippines)	12.3	0.08
Selenocosmiinae	Orphnaecus	Orphnaecus spec. (Philippines)	12.4	0.1
Selenocosmiinae	Orphnaecus	Orphnaecus spec. (Philippines)	12.4	0
Selenocosmiinae	Orphnaecus	Orphnaecus spec. (Philippines)	13.1	0.7
Selenocosmiinae	Orphnaecus	Orphnaecus spec. (Philippines)	13.3	0.99
Selenocosmiinae	Orphnaecus	Orphnaecus spec. (Philippines)	13.7	0
Selenocosmiinae	Orphnaecus	Orphnaecus spec. (Philippines)	14	0
Selenocosmiinae	Orphnaecus	Orphnaecus spec. (Philippines)	14.5	2.01
Selenocosmiinae	Orphnaecus	Orphnaecus spec. (Philippines)	14.7	0
Selenocosmiinae	Orphnaecus	Orphnaecus spec. (Philippines)	14.9	2.04
Selenocosmiinae	Orphnaecus	Orphnaecus spec. (Philippines)	15	1.41
Selenocosmiinae	Orphnaecus	Orphnaecus spec. (Philippines)	15	0.2
Selenocosmiinae	Orphnaecus	Orphnaecus spec. (Philippines)	15.1	6.43
Selenocosmiinae	Orphnaecus	Orphnaecus spec. (Phillippines)	16.1	0.4
Selenocosmiinae	Orphnaecus	Orphnaecus spec. (Phillippines)	16.7	7.95
Selenocosmiinae	Orphnaecus	Orphnaecus spec. (Phillippines)	16.9	6.91
Selenocosmiinae	Orphnaecus	Orphnaecus spec. (Phillippines)	17.2	1.31
Selenocosmiinae	Orphnaecus	Orphnaecus spec. (Phillippines)	17.8	2.63
Selenocosmiinae	Orphnaecus	Orphnaecus spec. (Phillippines)	18.6	8.6
Selenocosmiinae	Orphnaecus	Orphnaecus spec. (Phillippines)	18.6	0.2
Selenocosmiinae	Phlogiellus	Phlogiellus spec. ('inermis')	10.7	0.4
Selenocosmiinae	Phlogiellus	Phlogiellus spec. (Thailand)	5.8	0.1
Selenocosmiinae	Phlogiellus	Phlogiellus spec. (Thailand)	5.8	0
Selenocosmiinae	Phlogiellus	Phlogiellus spec. (Thailand)	7.7	0
Selenocosmiinae	Phlogiellus	Phlogiellus spec. (Thailand)	7.7	0
Selenocosmiinae	Phlogiellus	Phlogiellus spec. (Thailand)	8.4	0
Selenocosmiinae	Phlogiellus	Phlogiellus watasei	8.2	0
Selenocosmiinae	Phlogiellus	Phlogiellus watasei	8.4	0.1
Selenocosmiinae	Phlogiellus	Selenocosmia spec. (Borneo)	9.9	3.1
Selenocosmiinae	Phlogiellus	Selenocosmia spec. (Borneo)	15.5	3.4
Selenocosmiinae	Phlogiellus	Selenocosmia spec. (Borneo)	16.4	0.4
Selenocosmiinae	Selenocosmia	Chilocosmia peerboomi	18.8	1.1
Selenocosmiinae	Selenocosmia	Selenocosmia arndsti	17	4.8
Selenocosmiinae	Selenocosmia	Selenocosmia arndsti	20.1	3.1
Selenocosmiinae	Selenocosmia	Selenocosmia aruana	18.2	0.11
Selenocosmiinae	Selenocosmia	Selenocosmia aruana	19.4	0.3
Selenocosmiinae	Selenocosmia	Selenocosmia aruana	19.6	0.42
Selenocosmiinae	Selenocosmia	Selenocosmia aruana	20	4.18
Selenocosmiinae	Selenocosmia	Selenocosmia aruana	21.2	6.04
Selenocosmiinae	Selenocosmia	Selenocosmia aruana	21.4	0.84
Selenocosmiinae	Selenocosmia	Selenocosmia aruana	22	1.56
Selenocosmiinae	Selenocosmia	Selenocosmia aruana	22	0.26
Selenocosmiinae	Selenocosmia	Selenocosmia effera	15.1	5.4
Selenocosmiinae	Selenocosmia	Selenocosmia effera	18.4	3.3
Selenocosmiinae	Selenocosmia	Selenocosmia effera	18.4	2.5
Selenocosmiinae	Selenocosmia	Selenocosmia effera	18.6	6.1
Selenocosmiinae	Selenocosmia	Selenocosmia javanensis sumatrana	25.9	6.7
Selenocosmiinae	Selenocosmia	Selenocosmia spec. (Borneo)	18.3	5.9
Selenocosmiinae	Selenocosmia	Selenocosmia spec. (Malaysia)	10.2	0
Selenocosmiinae	Selenocosmia	Selenocosmia spec. (Malaysia)	12.1	0.5
Selenocosmiinae	Selenocosmia	Selenocosmia spec. (Papua New-Guinea)	15.3	0.5
Selenocosmiinae	Selenocosmia	Selenocosmina javanensis	14.5	0.84
Selenocosmiinae	Selenocosmia	Selenocosmina javanensis	15.1	1.75
Selenocosmiinae	Selenocosmia	Selenocosmina javanensis	16.5	1.83
Selenocosmiinae	Selenocosmia	Selenocosmina javanensis	16.6	0.39
Selenocosmiinae	Selenocosmia	Selenocosmina javanensis sumatrana	20.1	0.1
Selenocosmiinae	unkown	Selenocosmiinae spec. (Borneo)	19.6	2.38
Selenocosmiinae	unkown	Selenocosmiinae spec. (Borneo)	20.1	0.5
Selenocosmiinae	unkown	Selenocosmiinae spec. (Borneo)	20.6	1.08
Selenocosmiinae	unkown	Selenocosmiinae spec. (Borneo)	21.3	0.27
Selenocosmiinae	unkown	Selenocosmiinae spec. (Borneo)	21.7	2.41
Selenocosmiinae	unkown	Selenocosmiinae spec. (Philippines)	15.9	0
Stromatopelminae	Encyocratella	Encyocratella olivacea	18	6.1
Stromatopelminae	Heteroscodra	Heteroscodra maculata	15.7	0
Stromatopelminae	Heteroscodra	Heteroscodra maculata	16.7	1.3
Stromatopelminae	Heteroscodra	Heteroscodra maculata	16.9	3.2
Stromatopelminae	Heteroscodra	Heteroscodra maculata	16.9	2.1
Stromatopelminae	Heteroscodra	Heteroscodra maculata	17.3	0.3
Stromatopelminae	Heteroscodra	Heteroscodra maculata	18	1.36
Stromatopelminae	Heteroscodra	Heteroscodra maculata	19.2	1
Stromatopelminae	Heteroscodra	Heteroscodra maculata	20.1	5
Stromatopelminae	Heteroscodra	Heteroscodra maculata	20.9	4.5
Stromatopelminae	Heteroscodra	Heteroscodra maculata	21.8	0.5
Stromatopelminae	Heteroscodra	Heteroscodra maculata	22	0.6
Stromatopelminae	Stromatopelma	Stromatopelma calceatum	17	2.7
Stromatopelminae	Stromatopelma	Stromatopelma calceatum	19.6	4.5
Stromatopelminae	Stromatopelma	Stromatopelma calceatum	20	3
Stromatopelminae	Stromatopelma	Stromatopelma calceatum	22	10.53
Theraphosinae	Acanthoscurria	Acanthoscurria antillensis	15.8	1.4
Theraphosinae	Acanthoscurria	Acanthoscurria antillensis	16.4	2.2
Theraphosinae	Acanthoscurria	Acanthoscurria brocklehursti	25.5	0
Theraphosinae	Acanthoscurria	Acanthoscurria brocklehursti	27.1	0
Theraphosinae	Acanthoscurria	Acanthoscurria cf. insubtilis	20.6	7.3
Theraphosinae	Acanthoscurria	Acanthoscurria geniculata	21.3	10.55
Theraphosinae	Acanthoscurria	Acanthoscurria geniculata	22	8.52
Theraphosinae	Acanthoscurria	Acanthoscurria geniculata	25.8	9.3
Theraphosinae	Acanthoscurria	Acanthoscurria geniculata	26	8
Theraphosinae	Acanthoscurria	Acanthoscurria geniculata	27	7.17
Theraphosinae	Acanthoscurria	Acanthoscurria geniculata	29.4	2.35
Theraphosinae	Acanthoscurria	Acanthoscurria geniculata	29.5	5.1
Theraphosinae	Acanthoscurria	Acanthoscurria geniculata	30.8	12.8
Theraphosinae	Acanthoscurria	Acanthoscurria geniculata	33.4	8.44
Theraphosinae	Acanthoscurria	Acanthoscurria musculosa	24.7	10.11
Theraphosinae	Acanthoscurria	Acanthoscurria spec. (Bolivia)	12	0.4
Theraphosinae	Acanthoscurria	Acanthoscurria spec. (Bolivia)	17.4	0
Theraphosinae	Acanthoscurria	Acanthoscurria spec. (Venezuela)	20	8.31
Theraphosinae	Agnostopelma	Agnostopelma tota	7.7	0.1
Theraphosinae	Agnostopelma	Agnostopelma tota	8.3	0.2
Theraphosinae	Agnostopelma	Agnostopelma tota	8.3	0
Theraphosinae	Agnostopelma	Agnostopelma tota	10.5	0.1
Theraphosinae	Aphonopelma	Aphonopelma bicoloratum	19.1	0.43
Theraphosinae	Aphonopelma	Aphonopelma calchodes	20.1	0.2
Theraphosinae	Aphonopelma	Aphonopelma chalcodes	21.4	1
Theraphosinae	Aphonopelma	Aphonopelma crinitum	16.1	0.6
Theraphosinae	Aphonopelma	Aphonopelma iodium	15.4	0.1
Theraphosinae	Aphonopelma	Aphonopelma seemanni	21.2	0.6
Theraphosinae	Aphonopelma	Aphonopelma seemanni	24	0
Theraphosinae	Aphonopelma	Aphonopelma seemanni	24.9	0
Theraphosinae	Aphonopelma	Aphonopelma seemanni	25.1	0
Theraphosinae	Aphonopelma	Aphonopelma seemanni	25.2	0
Theraphosinae	Aphonopelma	Aphonopelma seemanni	25.4	0.36
Theraphosinae	Aphonopelma	Aphonopelma spec. (Malinche)	12.4	0.1
Theraphosinae	Aphonopelma	Aphonopelma spec. (Malinche)	13.7	1.3
Theraphosinae	Aphonopelma	Aphonopelma spec. (Malinche)	14.7	0.8
Theraphosinae	Aphonopelma	Aphonopelma spec. (Mexico)	22.9	1.1
Theraphosinae	Aphonopelma	Aphonopelma spec. (Panama)	17.3	0.1
Theraphosinae	Aphonopelma	Aphonopelma spec. (Panama)	18.1	0.3
Theraphosinae	Aphonopelma	Aphonopelma spec. (Panama)	20.4	0.5
Theraphosinae	Aphonopelma	Aphonopelma spec. (USA)	18	0
Theraphosinae	Aphonopelma	Aphonopelma texense	14	1.1
Theraphosinae	Bonnetina	Bonnetina rudloffi	16.1	0.2
Theraphosinae	Bonnetina	Schizopelma spec. (Mexico)	10.1	0.4
Theraphosinae	Bonnetina	Schizopelma tanzeri	14.5	0.33
Theraphosinae	Bonnetina	Schizopelma tanzeri	14.7	1
Theraphosinae	Brachypelma	Brachypelma albiceps	23.1	0.64
Theraphosinae	Brachypelma	Brachypelma annitha	19.6	0
Theraphosinae	Brachypelma	Brachypelma annitha	20.4	1
Theraphosinae	Brachypelma	Brachypelma annitha	20.8	0
Theraphosinae	Brachypelma	Brachypelma annitha	21.2	7.3
Theraphosinae	Brachypelma	Brachypelma annitha	24.7	0.64
Theraphosinae	Brachypelma	Brachypelma annitha	21	0.37
Theraphosinae	Brachypelma	Brachypelma annitha	21.1	0.05
Theraphosinae	Brachypelma	Brachypelma auratum	19.3	0
Theraphosinae	Brachypelma	Brachypelma auratum	20.1	0.16
Theraphosinae	Brachypelma	Brachypelma auratum	22.7	0.91
Theraphosinae	Brachypelma	Brachypelma boehmei	20.1	1.2
Theraphosinae	Brachypelma	Brachypelma boehmei	21	0.5
Theraphosinae	Brachypelma	Brachypelma boehmei	21.3	2.4
Theraphosinae	Brachypelma	Brachypelma boehmei	21.7	2.7
Theraphosinae	Brachypelma	Brachypelma boehmei	22.2	1.8
Theraphosinae	Brachypelma	Brachypelma boehmei	23.2	3.6
Theraphosinae	Brachypelma	Brachypelma boehmei	25.1	1
Theraphosinae	Brachypelma	Brachypelma emilia	22.2	2.6
Theraphosinae	Brachypelma	Brachypelma emilia	23	6.8
Theraphosinae	Brachypelma	Brachypelma klaasi	21.2	0.2
Theraphosinae	Brachypelma	Brachypelma smithi	19.7	2.89
Theraphosinae	Brachypelma	Brachypelma smithi	21.2	2.5
Theraphosinae	Brachypelma	Brachypelma smithi	21.2	2.5
Theraphosinae	Brachypelma	Brachypelma smithi	22	0
Theraphosinae	Brachypelma	Brachypelma smithi	25	4
Theraphosinae	Chromatopelma	Chromatopelma cyaneopubescens	16.5	0.2
Theraphosinae	Chromatopelma	Chromatopelma cyaneopubescens	19.1	0.12
Theraphosinae	Chromatopelma	Chromatopelma cyaneopubescens	20.6	0.6
Theraphosinae	Chromatopelma	Chromatopelma cyaneopubescens	22.5	3.58
Theraphosinae	Chromatopelma	Chromatopelma cyaneopubescens	23.1	0.3
Theraphosinae	Crassicrus	Crassicrus lamanai	16.5	0.3
Theraphosinae	Cyclosternum	Cyclosternum spec. (Colombia)	12.1	0.3
Theraphosinae	Cyclosternum	Cyclosternum spec. (Colombia)	12.3	0.3
Theraphosinae	Cyclosternum	Cyclosternum spec. (Colombia)	12.3	0.1
Theraphosinae	Cyclosternum	Cyclosternum spec. (Colombia)	12.4	0.6
Theraphosinae	Cyclosternum	Cyclosternum spec. (Colombia)	13	1.5
Theraphosinae	Cyclosternum	Cyclosternum spec. (Colombia)	14.2	0
Theraphosinae	Cyclosternum	Cyclosternum spec. (Colombia)	14.5	1.67
Theraphosinae	Cyclosternum	Cyclosternum spec. (Colombia)	16.1	0.5
Theraphosinae	Cyclosternum	Cyclosternum spec. (Colombia)	17	0.1
Theraphosinae	Cyclosternum	Cyclosternum spec. (Colombia)	18.3	0.6
Theraphosinae	Cyclosternum	Metriopelma familiare	10.4	0
Theraphosinae	Cyclosternum	Metriopelma familiare	10.6	0.3
Theraphosinae	Cyclosternum	Metriopelma familiare	10.6	0.1
Theraphosinae	Cyclosternum	Metriopelma familiare	11.5	0.62
Theraphosinae	Cyclosternum	Metriopelma ledezmae	12.2	0.12
Theraphosinae	Cyclosternum	Metriopelma spec. (Venezuela)	12.7	0.4
Theraphosinae	Cyclosternum	Metriopelma spec. (Venezuela)	12.7	0.2
Theraphosinae	Cyclosternum	Metriopelma spec. (Venezuela)	13.5	0
Theraphosinae	Cyclosternum	Metriopelma spec. (Venezuela)	13.7	0.3
Theraphosinae	Cyriocosmus	Cyriocosmus bertae	6.9	0
Theraphosinae	Cyriocosmus	Cyriocosmus bertae	9.1	0
Theraphosinae	Cyriocosmus	Cyriocosmus bertae	11.2	0.1
Theraphosinae	Cyriocosmus	Cyriocosmus elegans	6.6	0.1
Theraphosinae	Cyriocosmus	Cyriocosmus perezmilesi	7.2	0
Theraphosinae	Cyriocosmus	Cyriocosmus perezmilesi	8.5	0.3
Theraphosinae	Cyriocosmus	Cyriocosmus perezmilesi	9	0.2
Theraphosinae	Cyriocosmus	Cyriocosmus perezmilesi	9.2	0.6
Theraphosinae	Cyriocosmus	Cyriocosmus perezmilesi	9.2	0.2
Theraphosinae	Cyriocosmus	Cyriocosmus sellatus	12.3	0.3
Theraphosinae	Cyriocosmus	Cyriocosmus sellatus	11	0.2
Theraphosinae	Cyrtopholis	Cyrtopholis ramsi	11.1	0
Theraphosinae	Cyrtopholis	Cyrtopholis ramsi	11.4	0.91
Theraphosinae	Cyrtopholis	Cyrtopholis ramsi	12.3	0
Theraphosinae	Cyrtopholis	Cyrtopholis ramsi	12.8	0.12
Theraphosinae	Cyrtopholis	Cyrtopholis ramsi	12.9	0
Theraphosinae	Cyrtopholis	Cyrtopholis ramsi	13.3	0
Theraphosinae	Cyrtopholis	Cyrtopholis ramsi	11.3	0.2
Theraphosinae	Cyrtopholis	Cyrtopholis ramsi	13.1	1.1
Theraphosinae	Cyrtopholis	Cyrtopholis ramsi	13.7	0.1
Theraphosinae	Davus	Davus fasciatus	14.1	0.1
Theraphosinae	Davus	Davus fasciatus	16.4	0.5
Theraphosinae	Davus	Davus fasciatus	16.9	0.7
Theraphosinae	Davus	Davus fasciatus	16.9	0.1
Theraphosinae	Davus	Davus fasciatus	17.2	0.2
Theraphosinae	Davus	Davus fasciatus	17.4	1
Theraphosinae	Davus	Davus fasciatus	17.6	2
Theraphosinae	Davus	Davus fasciatus	17.6	0
Theraphosinae	Davus	Davus fasciatus	17.6	0
Theraphosinae	Davus	Davus fasciatus	17.7	0.95
Theraphosinae	Davus	Davus fasciatus	18.2	0.2
Theraphosinae	Davus	Davus fasciatus	19.1	0.1
Theraphosinae	Euathlus	Euathlus pulcherrimaklaasi	20.2	3.25
Theraphosinae	Euathlus	Euathlus pulcherrimaklaasi	23	4.1
Theraphosinae	Euathlus	Euathlus spec.	10.2	0.99
Theraphosinae	Euathlus	Euathlus spec.	11.1	0.1
Theraphosinae	Euathlus	Euathlus spec.	11.3	0.55
Theraphosinae	Euathlus	Euathlus spec.	12.4	1.61
Theraphosinae	Euathlus	Euathlus spec. (blue, Chile)	13.5	0.4
Theraphosinae	Euathlus	Euathlus spec. (blue, Chile)	14.5	1.3
Theraphosinae	Euathlus	Euathlus spec. (blue, Chile)	14.5	0.5
Theraphosinae	Euathlus	Euathlus spec. (blue, Chile)	18.2	0.7
Theraphosinae	Euathlus	Euathlus spec. (green, Chile)	17.3	0.1
Theraphosinae	Euathlus	Euathlus spec. (green, Chile)	17.9	0.5
Theraphosinae	Euathlus	Euathlus spec. (green, Chile)	18	0.3
Theraphosinae	Euathlus	Euathlus spec. (green, Chile)	20.1	1.1
Theraphosinae	Euathlus	Euathlus spec. (green, Chile)	20.4	1.4
Theraphosinae	Euathlus	Euathlus spec. (green, Chile)	20.5	0
Theraphosinae	Euathlus	Euathlus spec. (smaragd, Chile)	7.5	0.1
Theraphosinae	Euathlus	Euathlus spec. (smaragd, Chile)	8.1	0.1
Theraphosinae	Euathlus	Euathlus spec. (smaragd, Chile)	8.3	0.1
Theraphosinae	Euathlus	Euathlus spec. (smaragd, Chile)	10.1	0.1
Theraphosinae	Euathlus	Euathlus spec. (smaragd, Chile)	10.2	0.2
Theraphosinae	Euathlus	Euathlus spec. (violet, Chile)	12.4	0.2
Theraphosinae	Euathlus	Euathlus spec. (violet, Chile)	13	0.5
Theraphosinae	Euathlus	Euathlus truculentus	14.5	0.9
Theraphosinae	Euathlus	Euathlus truculentus	15.4	0.3
Theraphosinae	Euathlus	Euathlus truculentus	16.1	1.3
Theraphosinae	Euathlus	Euathlus truculentus	16.5	0.2
Theraphosinae	Euathlus	Paraphysa parvula	13.1	0.9
Theraphosinae	Euathlus	Paraphysa parvula	13.8	1.6
Theraphosinae	Euathlus	Paraphysa parvula	13.9	0.1
Theraphosinae	Euathlus	Paraphysa parvula	14.5	0.8
Theraphosinae	Euathlus	Paraphysa parvula	15	0.4
Theraphosinae	Euathlus	Paraphysa parvula	16.8	0.8
Theraphosinae	Eupalaestrus	Eupalaestrus campestratus	16.4	0
Theraphosinae	Eupalaestrus	Eupalaestrus campestratus	16.7	1.1
Theraphosinae	Eupalaestrus	Eupalaestrus campestratus	18.1	0.5
Theraphosinae	Eupalaestrus	Eupalaestrus campestratus	18.2	2.26
Theraphosinae	Eupalaestrus	Eupalaestrus campestratus	19.4	0.6
Theraphosinae	Eupalaestrus	Eupalaestrus campestratus	19.8	0.4
Theraphosinae	Eupalaestrus	Eupalaestrus tarsicrassus	19.1	0.3
Theraphosinae	Eupalaestrus	Eupalaestrus weijenberghi	14.7	1.2
Theraphosinae	Grammostola	Grammostola actaeon	21.9	4.1
Theraphosinae	Grammostola	Grammostola grossa	17.3	3.6
Theraphosinae	Grammostola	Grammostola grossa	18.5	1.4
Theraphosinae	Grammostola	Grammostola grossa	19	5.1
Theraphosinae	Grammostola	Grammostola grossa	25	0
Theraphosinae	Grammostola	Grammostola mollicoma	26.1	0
Theraphosinae	Grammostola	Grammostola porteri	19.4	5.7
Theraphosinae	Grammostola	Grammostola porteri	20.3	0
Theraphosinae	Grammostola	Grammostola porteri	21.7	3.6
Theraphosinae	Grammostola	Grammostola porteri	22	3.5
Theraphosinae	Grammostola	Grammostola porteri	23.2	1.4
Theraphosinae	Grammostola	Grammostola porteri	23.3	0
Theraphosinae	Grammostola	Grammostola pulchra	14.2	0
Theraphosinae	Grammostola	Grammostola pulchra	23.4	1
Theraphosinae	Grammostola	Grammostola pulchra	25.2	0.25
Theraphosinae	Grammostola	Grammostola pulchra	25.6	0.6
Theraphosinae	Grammostola	Grammostola pulchra	25.8	1.2
Theraphosinae	Grammostola	Grammostola pulchra	26.5	0.6
Theraphosinae	Grammostola	Grammostola pulchra	27.2	0.2
Theraphosinae	Grammostola	Grammostola pulchripes	22.4	4
Theraphosinae	Grammostola	Grammostola pulchripes	23	7.17
Theraphosinae	Grammostola	Grammostola pulchripes	24.1	0.73
Theraphosinae	Grammostola	Grammostola pulchripes	25.3	0.3
Theraphosinae	Grammostola	Grammostola rosea	17.1	5.1
Theraphosinae	Grammostola	Grammostola rosea	17.2	1.3
Theraphosinae	Grammostola	Grammostola rosea	18.1	0.2
Theraphosinae	Grammostola	Grammostola rosea	22.8	0.1
Theraphosinae	Grammostola	Grammostola spec. (Chile)	14.5	1.8
Theraphosinae	Grammostola	Grammostola spec. (Chile)	16.3	1.1
Theraphosinae	Grammostola	Grammostola spec. (Chile)	17.1	0.2
Theraphosinae	Grammostola	Grammostola spec. (Chile)	17.3	0.9
Theraphosinae	Grammostola	Grammostola spec. (Chile)	17.4	0.3
Theraphosinae	Grammostola	Grammostola spec. (Chile)	17.4	0.2
Theraphosinae	Grammostola	Grammostola spec. (Chile)	18.1	0.1
Theraphosinae	Grammostola	Grammostola spec. (Chile)	18.3	0.3
Theraphosinae	Grammostola	Grammostola spec. (Chile)	18.3	0.2
Theraphosinae	Grammostola	Grammostola spec. (Chilean North)	15.4	2.2
Theraphosinae	Grammostola	Grammostola spec. (Chilean North)	17.3	0.2
Theraphosinae	Grammostola	Grammostola spec. (Chilean North)	18	1.8
Theraphosinae	Grammostola	Grammostola spec. (Chilean North)	18.1	5.7
Theraphosinae	Grammostola	Grammostola spec. (Chilean North)	18.1	0.9
Theraphosinae	Grammostola	Grammostola spec. (Chilean North)	18.4	4.2
Theraphosinae	Hapalopus	Hapalopus spec. (gross, Colombia)	11.3	0.4
Theraphosinae	Hapalopus	Hapalopus spec. (gross, Colombia)	11.5	0.2
Theraphosinae	Hapalopus	Hapalopus spec. (gross, Colombia)	12.3	0.11
Theraphosinae	Hapalopus	Hapalopus spec. (gross, Colombia)	12.4	0.5
Theraphosinae	Hapalopus	Hapalopus spec. (gross, Colombia)	13.4	0.6
Theraphosinae	Hapalopus	Hapalopus spec. (klein, Colombia)	10.2	0.21
Theraphosinae	Hapalopus	Hapalopus triseriatus	6.7	0.2
Theraphosinae	Hapalopus	Hapalopus triseriatus	7.5	0
Theraphosinae	Homoeomma	Euathlus spec. (Chile)	8.1	0.4
Theraphosinae	Homoeomma	Euathlus spec. (Chile)	9.2	0.1
Theraphosinae	Homoeomma	Euathlus spec. (Chile)	9.5	0.5
Theraphosinae	Homoeomma	Euathlus spec. (Chile)	11.1	0.3
Theraphosinae	Homoeomma	Euathlus spec. (Chile)	11.6	0.4
Theraphosinae	Homoeomma	Euathlus spec. (Chile)	11.6	0.2
Theraphosinae	Homoeomma	Euathlus spec. (Chile)	13.1	0.2
Theraphosinae	Homoeomma	Homoeomma spec. (blue)	18.6	2.9
Theraphosinae	Homoeomma	Homoeomma spec. (blue)	19.5	1
Theraphosinae	Homoeomma	Homoeomma spec. (blue)	22.2	3.9
Theraphosinae	Lasiodora	Lasiodora brevibulba	16	0.32
Theraphosinae	Lasiodora	Lasiodora difficilis	24.1	0.5
Theraphosinae	Lasiodora	Lasiodora difficilis	26.5	12.3
Theraphosinae	Lasiodora	Lasiodora difficilis	27.1	1.5
Theraphosinae	Lasiodora	Lasiodora klugi	27.1	22.9
Theraphosinae	Lasiodora	Lasiodora klugi	27.8	10.96
Theraphosinae	Lasiodora	Lasiodora klugi	31.3	10.57
Theraphosinae	Lasiodora	Lasiodora klugi	33	1.3
Theraphosinae	Lasiodora	Lasiodora parahybana	20.2	9
Theraphosinae	Lasiodora	Lasiodora parahybana	25.1	6.3
Theraphosinae	Lasiodora	Lasiodora parahybana	30.4	5.8
Theraphosinae	Lasiodora	Lasiodora parahybana	30.7	2.88
Theraphosinae	Lasiodora	Lasiodora striatipes	22.3	17.8
Theraphosinae	Lasiodorides	Lasiodorides polycuspulatus	22	0
Theraphosinae	Lasiodorides	Lasiodorides striatus	17.8	2.7
Theraphosinae	Lasiodorides	Lasiodorides striatus	20.2	0
Theraphosinae	Megaphobema	Megaphobema robustum	21.8	0.2
Theraphosinae	Megaphobema	Megaphobema robustum	21.9	0.4
Theraphosinae	Megaphobema	Megaphobema robustum	26	0
Theraphosinae	Megaphobema	Megaphobema robustum	30.3	0
Theraphosinae	Megaphobema	Megaphobema velvetosoma	20.1	0
Theraphosinae	Megaphobema	Megaphobema velvetosoma	20.6	0.1
Theraphosinae	Megaphobema	Megaphobema velvetosoma	23.1	0.2
Theraphosinae	Neischnocolus	Ami spec. (Colombia)	12.2	0.2
Theraphosinae	Neostenotarsus	Neostenotarsus guianensis	15.6	0.1
Theraphosinae	Nhandu	Nhandu chromatus	22.8	1.1
Theraphosinae	Nhandu	Nhandu chromatus	23.2	0
Theraphosinae	Nhandu	Nhandu colloratovillosum	20.2	3
Theraphosinae	Nhandu	Nhandu colloratovillosum	20.4	0.9
Theraphosinae	Nhandu	Nhandu coloratovillosum	19.5	0.9
Theraphosinae	Nhandu	Nhandu coloratovillosum	20.3	0.3
Theraphosinae	Nhandu	Nhandu coloratovillosum	20.5	0.7
Theraphosinae	Nhandu	Nhandu coloratovillosum	23	0
Theraphosinae	Nhandu	Nhandu tripepii	25.22	0.73
Theraphosinae	Nhandu	Nhandu tripepii	25.5	1.2
Theraphosinae	Pamphobeteus	Pamphobeteus antinous	26.1	11.6
Theraphosinae	Pamphobeteus	Pamphobeteus antinous	31.2	1
Theraphosinae	Pamphobeteus	Pamphobeteus cf. petersi	25.4	1.3
Theraphosinae	Pamphobeteus	Pamphobeteus cf. petersi	26.2	0.3
Theraphosinae	Pamphobeteus	Pamphobeteus fortis	23.6	0
Theraphosinae	Pamphobeteus	Pamphobeteus fortis	23.7	6
Theraphosinae	Pamphobeteus	Pamphobeteus fortis	24.2	0.68
Theraphosinae	Pamphobeteus	Pamphobeteus nigricolor	32.8	5.4
Theraphosinae	Pamphobeteus	Pamphobeteus spec. (Colombia)	26.4	14.6
Theraphosinae	Pamphobeteus	Pamphobeteus spec. (Colombia)	30.3	6.2
Theraphosinae	Pamphobeteus	Pamphobeteus spec. (Peru, 'wuschi')	23.1	7.02
Theraphosinae	Pamphobeteus	Pamphobeteus spec. (Peru, 'wuschi')	24.8	2.14
Theraphosinae	Pamphobeteus	Pamphobeteus spec. (Peru, 'wuschi')	25	0.35
Theraphosinae	Pamphobeteus	Pamphobeteus spec. (platyomma)	26	6.1
Theraphosinae	Pamphobeteus	Pamphobeteus ultramarinus	21.4	0.1
Theraphosinae	Pamphobeteus	Pamphobeteus ultramarinus	22.1	0.3
Theraphosinae	Phormictopus	Phormictopus atrichomatus	22.6	1.2
Theraphosinae	Phormictopus	Phormictopus atrichromatus	28.8	4.58
Theraphosinae	Phormictopus	Phormictopus auratus	25.6	5.1
Theraphosinae	Phormictopus	Phormictopus cancerides	21.4	1.47
Theraphosinae	Phormictopus	Phormictopus cancerides	22.3	13.13
Theraphosinae	Phormictopus	Phormictopus cancerides	23	1.72
Theraphosinae	Phormictopus	Phormictopus cochleasvorax	15.3	0
Theraphosinae	Phormictopus	Phormictopus cochleasvorax	16.2	1.2
Theraphosinae	Phormictopus	Phormictopus cochleasvorax	16.4	0.32
Theraphosinae	Phormictopus	Phormictopus cochleasvorax	16.7	1.79
Theraphosinae	Phormictopus	Phormictopus cochleasvorax	17.1	0.2
Theraphosinae	Phrixotrichus	Euathlus vulpinus	10.5	1.4
Theraphosinae	Phrixotrichus	Euathlus vulpinus	15.1	0.22
Theraphosinae	Phrixotrichus	Paraphysa scrofa	11.9	0
Theraphosinae	Phrixotrichus	Paraphysa scrofa	14.1	0
Theraphosinae	Phrixotrichus	Paraphysa scrofa	14.7	1.5
Theraphosinae	Phrixotrichus	Paraphysa scrofa	15.2	1.3
Theraphosinae	Plesiopelma	Plesiopelma longisternale	9.3	0.3
Theraphosinae	Plesiopelma	Plesiopelma longisternale	9.4	0.2
Theraphosinae	Plesiopelma	Plesiopelma longisternale	12.2	0.6
Theraphosinae	Plesiopelma	Plesiopelma longisternale	16	0
Theraphosinae	Plesiopelma	Plesiopelma spec. (Bolivia)	17.2	4.6
Theraphosinae	Plesiopelma	Plesiopelma spec. (Bolivia)	18.2	2.6
Theraphosinae	Sericopelma	Sericopelma melanotarsum	18.2	0.39
Theraphosinae	Sericopelma	Sericopelma rubronietens	31.6	4
Theraphosinae	Sericopelma	Sericopelma silvicola	23.4	4.61
Theraphosinae	Sericopelma	Sericopelma silvicola	24.1	1.4
Theraphosinae	Sericopelma	Sericopelma silvicola	24.7	5.1
Theraphosinae	Sericopelma	Sericopelma spec. (Panama)	22.7	6.2
Theraphosinae	Sericopelma	Sericopelma spec. (Panama)	23.3	8.7
Theraphosinae	Sericopelma	Sericopelma spec. (Panama)	24.6	2.5
Theraphosinae	Sericopelma	Sericopelma spec. (Panama)	25	0.4
Theraphosinae	Sericopelma	Sericopelma spec. (Panama)	26.3	14.7
Theraphosinae	Sericopelma	Sericopelma spec. (Panama)	26.7	2.6
Theraphosinae	Sericopelma	Sericopelma spec. (Panama)	28.2	13.2
Theraphosinae	Sericopelma	Sericopelma spec. (Panama)	29	3.4
Theraphosinae	Sericopelma	Sericopelma spec. (Panama)	29.4	1.95
Theraphosinae	Sphaerobothria	Sphaerobothria hoffmanni	13.4	0.6
Theraphosinae	Sphaerobothria	Sphaerobothria hoffmanni	14.6	0.1
Theraphosinae	Sphaerobothria	Sphaerobothria hoffmanni	17.1	0
Theraphosinae	Sphaerobothria	Sphaerobothria hoffmanni	15.3	0.8
Theraphosinae	Spinosatibiapalpus	Pseudhapalopus spinulopalpus	15	0.5
Theraphosinae	Spinosatibiapalpus	Pseudhapalopus spinulopalpus	17.1	0.7
Theraphosinae	Spinosatibiapalpus	Pseudhapalopus spinulopalpus	17.4	0
Theraphosinae	Spinosatibiapalpus	Pseudhapalopus spinulopalpus	20.9	2
Theraphosinae	Stichoplastoris	Stichoplastoris spec. (Costa Rica)	16.4	3.85
Theraphosinae	Stichoplastoris	Stichoplastoris spec. (Costa Rica)	23	5.35
Theraphosinae	Theraphosa	Theraphosa apophysis	29.2	5.4
Theraphosinae	Theraphosa	Theraphosa apophysis	34.8	6.5
Theraphosinae	Theraphosa	Theraphosa blondi	31	3.9
Theraphosinae	Thrixopelma	Thrixopelma cyaneolum	14.6	0
Theraphosinae	Thrixopelma	Thrixopelma cyaneolum	16.2	0.6
Theraphosinae	Thrixopelma	Thrixopelma ockerti	20.7	0
Theraphosinae	Thrixopelma	Thrixopelma pruriens	23.1	0
Theraphosinae	Thrixopelma	Thrixopelma pruriens	25.4	0
Theraphosinae	Thrixopelma	Thrixopelma pruriens	25.7	5.4
Theraphosinae	Thrixopelma	Thrixopelma pruriens	26.1	0.1
Theraphosinae	Thrixopelma	Thrixopelma spec. (black, Chile)	18.3	0.3
Theraphosinae	Thrixopelma	Thrixopelma spec. (black, Chile)	18.5	0.2
Theraphosinae	Thrixopelma	Thrixopelma spec. (black, Chile)	19	0.3
Theraphosinae	Thrixopelma	Thrixopelma spec. (black, Chile)	19.5	0.3
Theraphosinae	Thrixopelma	Thrixopelma spec. (black, Chile)	20	0.2
Theraphosinae	Thrixopelma	Thrixopelma spec. (black, Chile)	23.1	0.2
Theraphosinae	Thrixopelma	Thrixopelma spec. (Chile)	23.5	2
Theraphosinae	Thrixopelma	Thrixopelma spec. (chocolate, Chile)	22.9	0.2
Theraphosinae	Thrixopelma	Thrixopelma spec. (lagunas)	19.4	5.7
Theraphosinae	Thrixopelma	Thrixopelma spec. (lagunas)	23	3.7
Theraphosinae	Thrixopelma	Thrixopelma spec. (Peru)	16.1	0.4
Theraphosinae	Thrixopelma	Thrixopelma spec. (Peru)	21.1	0.1
Theraphosinae	Thrixopelma	Thrixopelma spec. (Peru)	21.2	2.8
Theraphosinae	Tliltocatl	Brachypelma albopilosum	18.6	0.38
Theraphosinae	Tliltocatl	Brachypelma albopilosum	18.7	3
Theraphosinae	Tliltocatl	Brachypelma albopilosum	19.1	0
Theraphosinae	Tliltocatl	Brachypelma albopilosum	21.1	3.6
Theraphosinae	Tliltocatl	Brachypelma albopilosum	21.2	0.1
Theraphosinae	Tliltocatl	Brachypelma albopilosum	21.7	3.3
Theraphosinae	Tliltocatl	Brachypelma albopilosum	23.7	0.12
Theraphosinae	Tliltocatl	Brachypelma sabulosum	19.3	2.4
Theraphosinae	Tliltocatl	Brachypelma sabulosum	20.2	0.2
Theraphosinae	Tliltocatl	Brachypelma sabulosum	21	0.28
Theraphosinae	Tliltocatl	Brachypelma schroederi	14.5	0.9
Theraphosinae	Tliltocatl	Brachypelma schroederi	17.6	0.6
Theraphosinae	Tliltocatl	Brachypelma schroederi	17.8	0.3
Theraphosinae	Tliltocatl	Brachypelma schroederi	18.1	1.2
Theraphosinae	Tliltocatl	Brachypelma schroederi	18.3	0.77
Theraphosinae	Tliltocatl	Brachypelma vagans	20.4	1.7
Theraphosinae	Tliltocatl	Brachypelma vagans	24.4	1.8
Theraphosinae	Tliltocatl	Brachypelma verdezi	18.4	0.3
Theraphosinae	Tliltocatl	Brachypelma verdezi	18.4	0.1
Theraphosinae	Tliltocatl	Brachypelma verdezi	20.1	0.2
Theraphosinae	Tliltocatl	Brachypelma verdezi	20.5	0.1
Theraphosinae	Tliltocatl	Brachypelma verdezi	24.9	0
Theraphosinae	Tliltocatl	Brachypelma verdezi	25	2
Theraphosinae	Tliltocatl	Brachypelma verdezi	25.5	0
Theraphosinae	unknown	Pseudhapalopus spec. ('langhaarig', Colombia)	17.8	0.6
Theraphosinae	unknown	Pseudhapalopus spec. ('langhaarig', Colombia)	18.2	0.5
Theraphosinae	unknown	Pseudhapalopus spec. ('langhaarig', Colombia)	22.3	0.85
Theraphosinae	unknown	Pseudhapalopus spec. (Colombia)	16.9	0.4
Theraphosinae	unknown	Theraphosinae spec. (Bolivia)	10.4	0.2
Theraphosinae	unknown	Theraphosinae spec. (Chile)	16.1	0.5
Theraphosinae	unknown	Theraphosinae spec. (Colombia)	13.4	0.1
Theraphosinae	unknown	Theraphosinae spec. (Colombia)	14.5	1.32
Theraphosinae	unknown	Theraphosinae spec. (Mexico)	18.5	0.3
Theraphosinae	unknown	Theraphosinae spec. (Mexico)	19.2	0.6
Theraphosinae	unknown	Theraphosinae spec. (Mexico)	20.1	0.7
Theraphosinae	Xenesthis	Xenesthis immanis	26.1	6.8
Theraphosinae	Xenesthis	Xenesthis immanis	27.5	0
Theraphosinae	Xenesthis	Xenesthis immanis	28.3	0.7
Theraphosinae	Xenesthis	Xenesthis immanis	32.4	0
Theraphosinae	Xenesthis	Xenesthis immanis	32.5	0
Theraphosinae	Xenesthis	Xenesthis spec. ('white', Colombia)	31.4	5.3
Theraphosinae	Xenesthis	Xenesthis spec. ('white', Colombia)	32.1	0
Thrigmopoeinae	Haploclastus	Haploclastus nilgirinus	16.3	2.3
Thrigmopoeinae	Haploclastus	Haploclastus nilgirinus	16.9	1.1
Thrigmopoeinae	Haploclastus	Haploclastus spec.	11	0.1
